# Supplementary material for: Transient Viral Activation in Human T Cell Leukemia Virus Type 1-Infected Macaques Treated With Pomalidomide
Source: Front Med (Lausanne). 2022 May 5;9:897264. doi: 10.3389/fmed.2022.897264 (PMC9119179; doi:10.3389/fmed.2022.897264)
Supplement: Supplementary Table 1 — Animal history. The four animals used in this study were infected with HTLV-1 in a previous study investigating cell populations in viral infection (31). All macaques were infected for more than 350 days before treatment with Pom (0.2 mg/kg/day). HTLV-1 infection was confirmed by Western blot and PCR. One day prior to exposure to HTLV-1, macaques were treated with either clodronate at 5 mg/kg (Clodrosome®) or liposome control (Encapsome®, Encapsula NanoSciences LLC, Brentwood, Tennessee). [file Table_1.XLSX]

## Sheet: Sheet1
Supplementary Table S1. Animal history.
Animal ID	Source	Virus	Treatment	Viral DNA	Seroconversion
Zj22	NICHD	HTLV-1WT	Clodrosome®	+	+
Zi51	NICHD	HTLV-1WT	Clodrosome®	+	+
HPM	Alpha Genesis	HTLV-1WT	Clodrosome®	+	+
ZJ11	NICHD	HTLV-1WT	Encapsome®	+	+
